# Supplementary material
Source: Research Square preprint supplement (doi:10.21203/rs.3.rs-9893705/v1)
Supplement: Supplementary file 1 [file 4a3fddb66f8510529a39e280.docx]

**Supplementary Tables**

**Biocontrol potential of 3-Hydroxy-1,2-dimethyl-4(1H)-pyridone derived from endophytic fungi against *Venturia inaequalis***

| **S. No.** | **Primer Name** | **Primer Sequence** | **Size of Amplicon** | **Tm °C** |
| --- | --- | --- | --- | --- |
| **1** | K-Lab-ITS Universal-RT-18S-F | 5’TGAACCTGCGGAAGGATCATTGT 3’ | ~550bp | 70.6 |
| **2** | K-Lab- ITS Universal-RT-28S-R | 5’TATTGATATGCTTAAACTCAGCGGGT3’ | 66.1 |

Madeeha Naik1, Zafir A. Naik2, Andleeb Amin1,3, Gulzar A. Rather1, Suhail Ashraf4, Syed Inam ul Haq1, Javeed Iqbal Ahmad Bhat5, Zahoor A. Bhat6, Gulzar Ahmad Rather7, Bhagyashree Dhekale8  Sajad M. Zargar9, Khalid Z. Masoodi1*

**Supplementary Table S1:** Primers used for amplification of ITS1/ITS4 regions.

**Supplementary Table S2:** Molecular analysis using amplification of ITS region. Identified endophytic fungi of apple genotypes based on ITS sequences. ITS sequences were submitted to NCBI and accession numbers are provided table below:

| **Sequence ID** | **Species** | **Source** | **Geographical region** | **Gene bank accession number** |
| --- | --- | --- | --- | --- |
| SKUASTK_KLAB_E1 | *Fusarium oxysprorium* | Ambri | India: J&K, Srinagar, Shalimar | OR787433.1 |
| SKUASTK_KLAB_E2 | *Alternaria alestromeria* | Shalimar Apple | India: J&K, Srinagar, Shalimar | OR787434.1 |
| SKUASTK_KLAB_E3(I) | *Fusarium culmoram* | Shereen | India: J&K, Srinagar, Shalimar | OR787435.1 |
| SKUASTK_KLAB_E3(II) | *Fusarium culmoram* | Shereen | India: J&K, Srinagar, Shalimar | OR787436.1 |
| SKUASTK_KLAB_E4 | *Alternaria burnsi* | SuperChef | India: J&K, Srinagar, Shalimar | OR787437.1 |
| SKUASTK_KLAB_E5 | *Alternaria mali* | SuperChef | India: J&K, Srinagar, Shalimar | OR787438.1 |
| SKUASTK_KLAB_E6 | *Alternaria brassicola* | RedChef | India: J&K, Srinagar, Shalimar | OR787439.1 |
| SKUASTK_KLAB_E7 | *Fusarium radolens* | Ambri | India: J&K, Srinagar, Shalimar | OR787440.1 |
| SKUASTK_KLAB_E8 | *Fusarium radolens* | Ambri | India: J&K, Srinagar, Shalimar | OR787441.1 |
| SKUASTK_KLAB_E9 | *Alternaria alternate* | Shalimar Apple | India: J&K, Srinagar, Shalimar | OR787442.1 |
| SKUASTK_KLAB_E10 | *Alternaria tenuissima* | Shalimar Apple | India: J&K, Srinagar, Shalimar | OR787443.1 |
| SKUASTK_KLAB_E11 | *Epicoccum nigrum* | Shalimar Apple | India: J&K, Srinagar, Shalimar | OR787444.1 |
| SKUASTK_KLAB_E12 | *Alternaria tenuissima* | Shalimar Apple | India: J&K, Srinagar, Shalimar | OR787445.1 |
| SKUASTK_KLAB_E13 | *Alternaria tamaricis* | Ambri | India: J&K, Srinagar, Shalimar | PP754546 |
| SKUASTK_KLAB_E14 | *Epicoccum nigrum* | Ambri | India: J&K, Srinagar, Shalimar | PP754547 |
| SKUASTK_KLAB_E15 | *Bipolaris oryzae* | Ambri | India: J&K, Srinagar, Shalimar | PP754548 |
| SKUASTK_KLAB_E16 | *Pencilium polonicum* | Red delicious | India: J&K, Srinagar, Shalimar | PP754549 |
| SKUASTK_KLAB_E17 | *Epicoccum nigrum* | Red delicious | India: J&K, Srinagar, Shalimar | PP754550 |
| SKUASTK_KLAB_E18 | *Epicoccum layuense* | Red delicious | India: J&K, Srinagar, Shalimar | PP754551 |
| SKUASTK_KLAB_E19 | *Alternaria alternate* | Golden delicious | India: J&K, Srinagar, Shalimar | PP754552 |
| SKUASTK_KLAB_E20 | *Didymella pedeiae* | Golden delicious | India: J&K, Srinagar, Shalimar | PP754553 |
| SKUASTK_KLAB_E21 | *Alternaria alternate* | Golden delicious | India: J&K, Srinagar, Shalimar | PP754554 |
| SKUASTK_KLAB_E22 | *Fusarium tricinctum* | Maharaji | India: J&K, Srinagar, Shalimar | PP754555 |
| SKUASTK_KLAB_E23 | *Epicoccum nigrum* | Maharaji | India: J&K, Srinagar, Shalimar | PP754556 |
| SKUASTK_KLAB_E24 | *Epicoccum nigrum* | Maharaji | India: J&K, Srinagar, Shalimar | PP754557 |
| SKUASTK_KLAB_E25 | *Fusarium tricinctum* | Red delicious | India: J&K, Srinagar, Shalimar | PP754558 |
| SKUASTK_KLAB_E26 | *Alternaria tenuissima* | Ambri | India: J&K, Srinagar, Shalimar | PQ286511 |
| SKUASTK_KLAB_E27 | *Fusarium proliferatum* | Ambri | India: J&K, Srinagar, Shalimar | PQ286512 |
| SKUASTK_KLAB_E28 | *Fusarium culmoram* | Shalimar Apple | India: J&K, Srinagar, Shalimar | PQ286513 |
| SKUASTK_KLAB_E29 | *Alternaria angustiovoidea* | Shalimar Apple | India: J&K, Srinagar, Shalimar | PQ286514 |
| SKUASTK_KLAB_E30 | *Epicoccum nigrum* | Red delicious | India: J&K, Srinagar, Shalimar | PQ302585 |
| SKUASTK_KLAB_E31 | *Alternaria alternate* | Red delicious | India: J&K, Srinagar, Shalimar | PQ286515 |
| SKUASTK_KLAB_E32 | *Epicoccum nigrum* | Golden delicious | India: J&K, Srinagar, Shalimar | PQ302586 |
| SKUASTK_KLAB_E33 | *Talaromyces pinophilus* | Golden delicious | India: J&K, Srinagar, Shalimar | PQ286516 |
| SKUASTK_KLAB_E34 | *Talaromyces purpureogenus* | Golden delicious | India: J&K, Srinagar, Shalimar | PQ286517 |
| SKUASTK_KLAB_E35 | *Penicillium chrysogenum* | Maharaji | India: J&K, Srinagar, Shalimar | PQ286518 |
| SKUASTK_KLAB_E36 | *Talaromyces pinophilus* | Maharaji | India: J&K, Srinagar, Shalimar | PQ302587 |
| SKUASTK_KLAB_E37 | *Alternaria tenuissima* | Maharaji | India: J&K, Srinagar, Shalimar | PQ286519 |
| SKUASTK_KLAB_E38 | *Talaromyces pinophilus* | Maharaji | India: J&K, Srinagar, Shalimar | PQ286520 |
| SKUASTK_KLAB_E39 | *Talaromyces pinophilus* | Maharaji | India: J&K, Srinagar, Shalimar | PQ302588 |
| SKUASTK_KLAB_E40 | *Talaromyces pinophilus* | Golden delicious | India: J&K, Srinagar, Shalimar | PQ302589 |
| SKUASTK_KLAB_E41 | *Talaromyces verruculosus* | Golden delicious | India: J&K, Srinagar, Shalimar | PQ286521 |
| SKUASTK_KLAB_E42 | *Penicillium polonicum* | Ambri | India: J&K, Srinagar, Shalimar | PQ302590 |
| SKUASTK_KLAB_E43 | *Bjerkandera adusta* | Golden delicious | India: J&K, Srinagar, Shalimar | PQ286522 |
| SKUASTK_KLAB_E44 | *Bjerkandera adusta* | Golden delicious | India: J&K, Srinagar, Shalimar | PQ302591 |
| SKUASTK_KLAB_E45 | *Pseudothielavia terricola* | Maharaji | India: J&K, Srinagar, Shalimar | PQ286523 |
| SKUASTK_KLAB_E46 | *Talaromyces thailandensis* | Maharaji | India: J&K, Srinagar, Shalimar | PQ286524 |
| SKUASTK_KLAB_E47 | *Bjerkandera adusta* | Golden delicious | India: J&K, Srinagar, Shalimar | PQ286525 |
| SKUASTK_KLAB_E48 | *Talaromyces cellulolyticus* | Golden delicious | India: J&K, Srinagar, Shalimar | PQ286526 |
| SKUASTK_KLAB_E49 | *Talaromyces verruculosus* | Golden delicious | India: J&K, Srinagar, Shalimar | PQ286527 |
| SKUASTK_KLAB_E50 | *Talaromyces pinophilus* | Golden delicious | India: J&K, Srinagar, Shalimar | PQ286528 |
| SKUASTK_KLAB_E51 | *Fusarium Solani* | Maharaji | India: J&K, Srinagar, Shalimar | PQ764578 |

| **S. No.** | **Name of the target** | **Role of the target protein** | **UniProt ID** | **Reference** |
| --- | --- | --- | --- | --- |
| **1** | Lanosterol demethylase | Biosynthesis of sterols | A0A8H3ZBE1 | Leconte et al., 2024, Yoshida et al., 1993: Monk et al., 2020 |
| **2** | Succinate dehydrogenase | Component of the tricarboxylic acid cycle and electron transport chain | 0A8H3UAY0 | Ayer et al., 2020 |

**Supplementary Table S3:** Details of protein targets associated with virulence and pathogenicity of Venturia inaequalis.

**Supplementary Table S4a:** Colony description of Fusarium strains isolated from apple cultivars.

| **S. No** | **Isolate Name** | **Mycelium** | **Microconidia** | | | | **Macroconidia** | | |
| --- | --- | --- | --- | --- | --- | --- | --- | --- | --- |
|  |  |  | **Shape** | **Colour colony** | **Size(µm)** | **Septation** | **Shape** | **size(µm)** | **Septation** |
| 1 | *Fusarium oxysporum* | Densely branched | Ellipsoidal to cylindrical | White and Yellow coloured at agar base | 7.8x3.8 | 0-1 | Sickle shaped | 35x4µm | 2-4 |
| 2 | *Fusarium redolens* | Smooth branched cylindrical, pigmentation | Oval to cylindrical | White and pale-yellow coloured at agar base | 7.5x2.5 | 0-1 | Elongated apical cell | 30.35×6 | 2-5 |
| 3 | *Fusarium culmorum* | Branched, cylindrical mycelium | Oval to Ellipsoidal | Pale pink or reddish coloured at agar base | 10x3 | 0-1 | Sickle shaped | 29x5 µm | 4-5 |
| 4 | *Fusarium trunciticum* | Branched | Ellipsoidal | Initially, white turning light pink at agar base | 3.1x1.9 | 0-2 | Cylindrical | 30X5 µm | 3-5 |
| 5 | *Fusarium proliferatum* | Smooth branched | cylindrical | White colored at  agar base | 2x14 | 0 | Sickle shaped | 35x6 µm | 1-2 |

**Supplementary Table S4b:** Colony description of fungal endophytes isolated from selected apple cultivars.

| **S.NO.** | **Isolate Name** | **Colony colour** | **Conidia** | |
| --- | --- | --- | --- | --- |
| **Shape** | **Size(µm)** |
| 1 | Epicoccum *nigrum* | dark brown, dark orange to black | Spherical | 19 23 |
| 2 | Epicoccum layuense | dark brown, dark orange to black | Spherical | 11.2 20 |
| 3 | *Didymella pedeiae* | salmon to peach with white aerial mycelium | short cylindrical | 7 × 5 |
| 4 | *Alternaria alestromeria* | Greyish to black, fluffy or cotton | Club shaped | 20 × 10 |
| 5 | *Alternaria burnassi* | Dark olive to black | Long ellipsoid obclavate | 16 × 9 |
| 6 | *Alternaria mali* | Dark olivaceous green | Elongated to cylindrical | 20×12 |
| 7 | *Alternaria brassicola* | Iron grey | Obpyriform | 21×15 |
| 8 | *Alternaria.alternata* | light to dark brown | irregular ellipsoid to obclavate | 22 ×1 4 |
| 9 | *Alternaria.tenussima* | light to dark brown | Obpyriform | 18×10 |
| 10 | *A. Tamaricis* | Brownish black or Greyish black | irregular ellipsoid to obclavate | 15×9 |
| 11 | *Alternaria angustiovoidea* | Dark olive-brown to greyish black | Obclavate | 18×10 |
| 12 | *Pencilium polonicum* | Darker green to bluish green | Round | 3.7 - 3.5 |
| 13 | *Penicillium chrysogenum* | Darker green to bluish green | Round | 3.7 - 3.5 |
| 14 | *Bipolaris oryzae* | Greyish | Fusiform to cylinder | 56 x 13 |
| 15 | *Talaromyces pinophilus* | Greenish blue or greyish blue | Globose | 1.85 - 2. |
| 16 | *Talaromyces verruculosus* | Greenish blue or greyish blue | Globose | 2 – 3 |
| 17 | *Talaromyces thailandensis* | Greenish to yellowish green | Globose | 2 – 2 |
| 18 | *Talaromyces cellulolyticus* | Greenish to yellowish green | Globose | 2 - 3.5 |
| 19 | *Talaromyces verruculosus* | Greenish to yellowish green | Globose | 2 – 3 |
| 20 | *Bjerkandera adusta* | White to light grey | Ellipsoid | 7-3.5 |
| 21 | *Pseudothielavia terricola* | Brownish to greyish | Ellipsoidal to fusiform | 14 – 7 |

**Supplementary Table S5:** Efficacy of culture filtrate of endophyte Fusarium oxysporum at 6 per cent concentration against apple scab (Venturia inaequalis)

| **Treatment** | **Disease Incidence (%)** | **Per cent Disease Control** | **Disease Intensity (%)** | **Per cent Disease Control** |
| --- | --- | --- | --- | --- |
| **T1** | 24.00 | 60.00 | 9.67 | 60.27 |
| **T2** | 4.00 | 93.33 | 0.93 | 96.16 |
| **Control (Water spray)** | 60.00 | - | 24.33 | - |

T1: Culture filtrate of endophyte *Fusarium oxysporum* @ 6 %

T2: Fungicide Captan @ 0.3% [URL](https://unibielefeldde-my.sharepoint.com/personal/suhail_ashraf_uni-bielefeld_de/Documents/URL)
